# Supplementary material
Source: PubMed Central journal article supplement (PMC3370872)
Supplement: supp_194.12.3088_SuppMaterial.pdf [file supp_194.12.3088_SuppMaterial.pdf]

1 **Supplemental Figures**

3

5

7

9

11

13

15

17

19

21

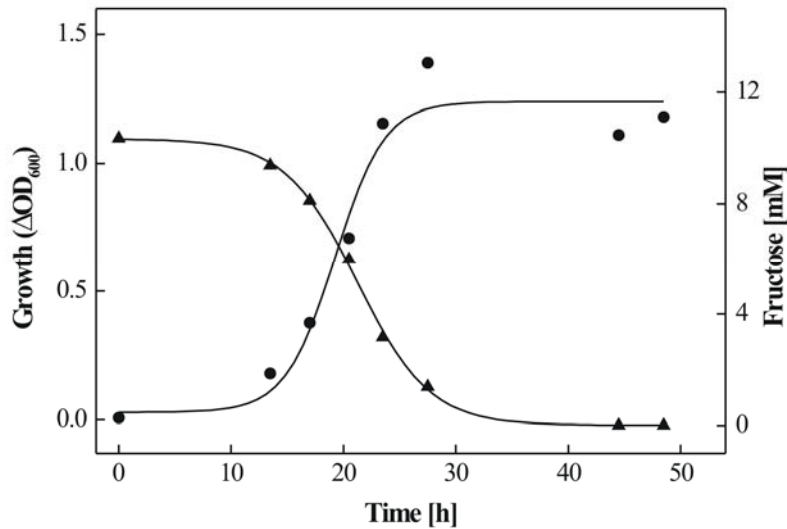

22 Fig. S1. Growth of *H. volcanii* H26 on fructose at 42 °C in minimal medium with fructose as  
 23 sole carbon and energy source. Growth (●) and fructose consumption (▲) was followed over  
 24 time. The preculture was grown in minimal medium with 10 mM fructose.

26

28

30

32

34

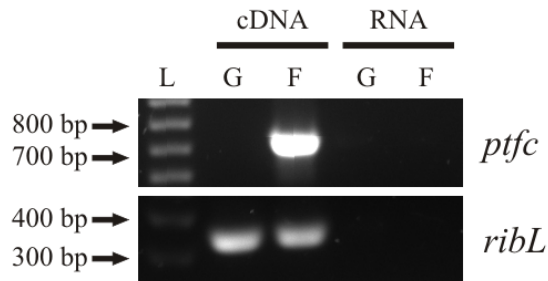

35 FIG. S2. RT-PCR of PTS component *ptfC* coding for EIIC of *H. volcanii* after growth on  
 36 glucose and fructose. Total RNA of cells, grown on minimal medium with glucose (G) or  
 37 fructose (F) was isolated, digested with DNase and reverse transcribed to cDNA with random  
 38 hexamers. From cDNA, PCR was performed with primers specific for *ptfC* encoding fructose  
 39 specific PTS component EIIC (upper panel). As an unregulated control, specific primers for  
 40 the *ribL10* transcript (14) were used (lower panel). For primer sequences see Table S1. In a  
 41 negative control, RNA was used that was not reverse transcribed to exclude contamination by  
 42 genomic DNA. L, base pair ladder.

43  
45  
47  
49  
51  
53  
55  
57  
59  
61  
63  
65  
67  
69  
71  
73  
75  
76  
77  
78  
79  
80  
81  
82  
83  
84  
85

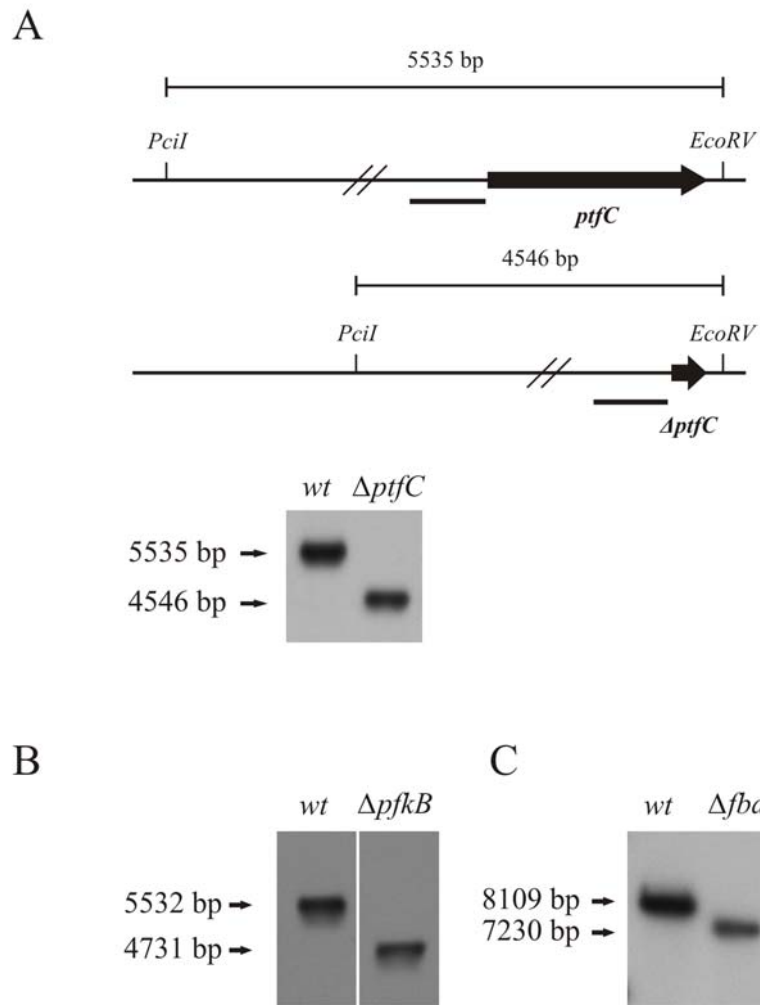

Fig. S3. Generation of the *ptfC* deletion mutant and verification of in-frame deletion strains by Southern blot analysis. (A) Construction of the *ptfC* deletion mutant. Wild type *ptfC* (long arrow),  $\Delta ptfC$  (short arrow), flanking regions and restriction sites (*PciI* and *EcoRV*) are shown. The hybridisation probe is indicated by a bar. Successful deletion was verified by Southern blot analysis after cleavage with the restriction enzymes indicated. The *pfk* (B) and *fba* (C) deletion mutants were analyzed in the same way. For restriction enzymes and primer sequences see Table S2.

86  
88  
90  
92  
94  
96  
98  
100  
102  
104  
106  
108  
110  
112  
114  
116  
118  
120  
122  
124  
125  
126  
127  
128  
129  
130

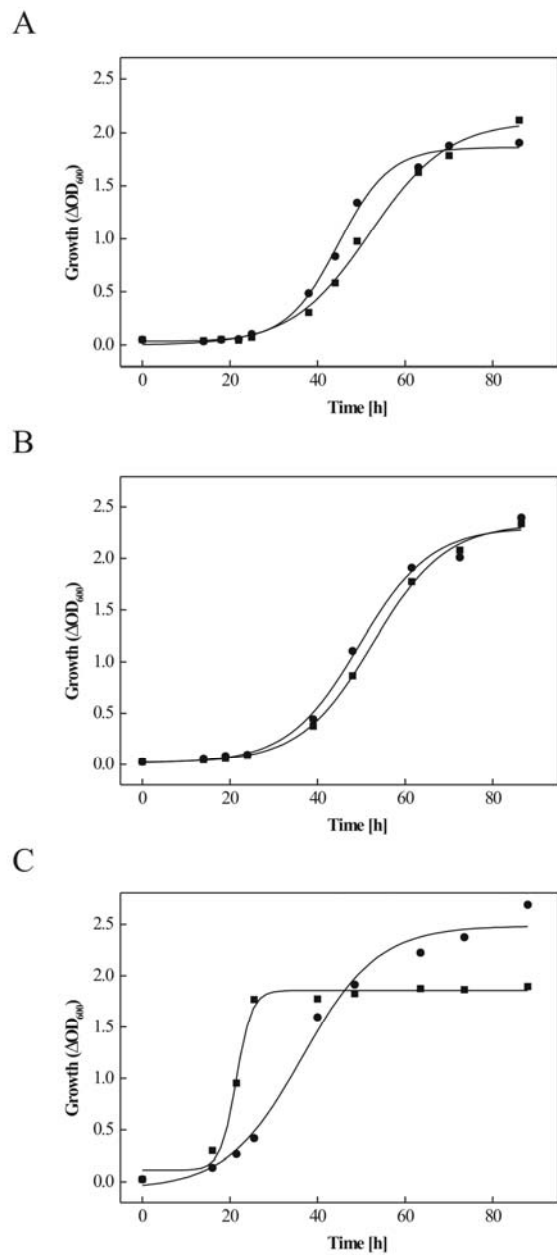

Fig. S4. Growth of *H. volcanii* wild type (●) and deletion strains (A)  $\Delta ptfC$ , (B)  $\Delta pfkB$  and (C)  $\Delta fba$  (each ■) on 25 mM glucose. Precultures were grown in complex medium containing 1 % Casamino Acids (A) and (B) or in synthetic medium containing 25 mM glucose (C).

132  
134  
136  
138  
140  
142  
144  
146  
148  
150  
152  
154  
156  
158  
160  
162  
164  
166  
168  
170  
171  
172  
173  
174  
175  
176  
177

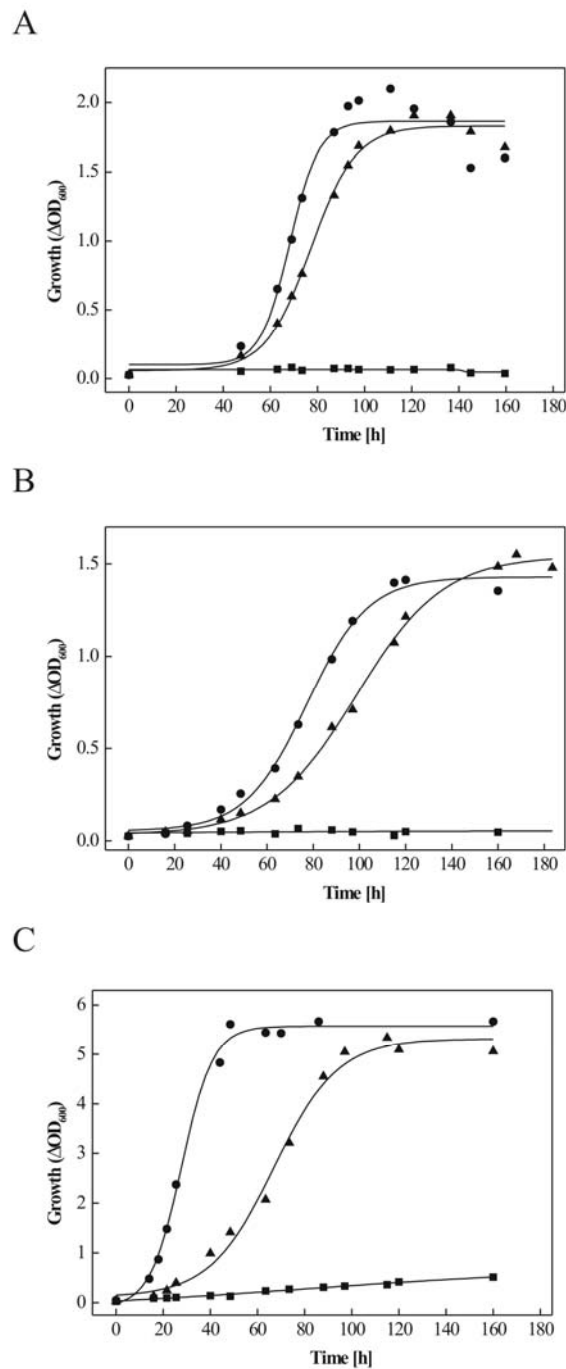

FIG. S5. Growth of *H. volcanii* wild type, *fba* mutant and complementation strain on different substrates. The cells were grown on minimal medium with (A) xylose, (B) acetate (each 25 mM) or (C) 1% Casamino Acids. With each substrate, wild type (●),  $\Delta fba$  (■) and the complementation strain (▲) were grown. Precultures were grown on synthetic medium with 20 mM glucose. Growth was measured by determining the optical density at 600 nm.

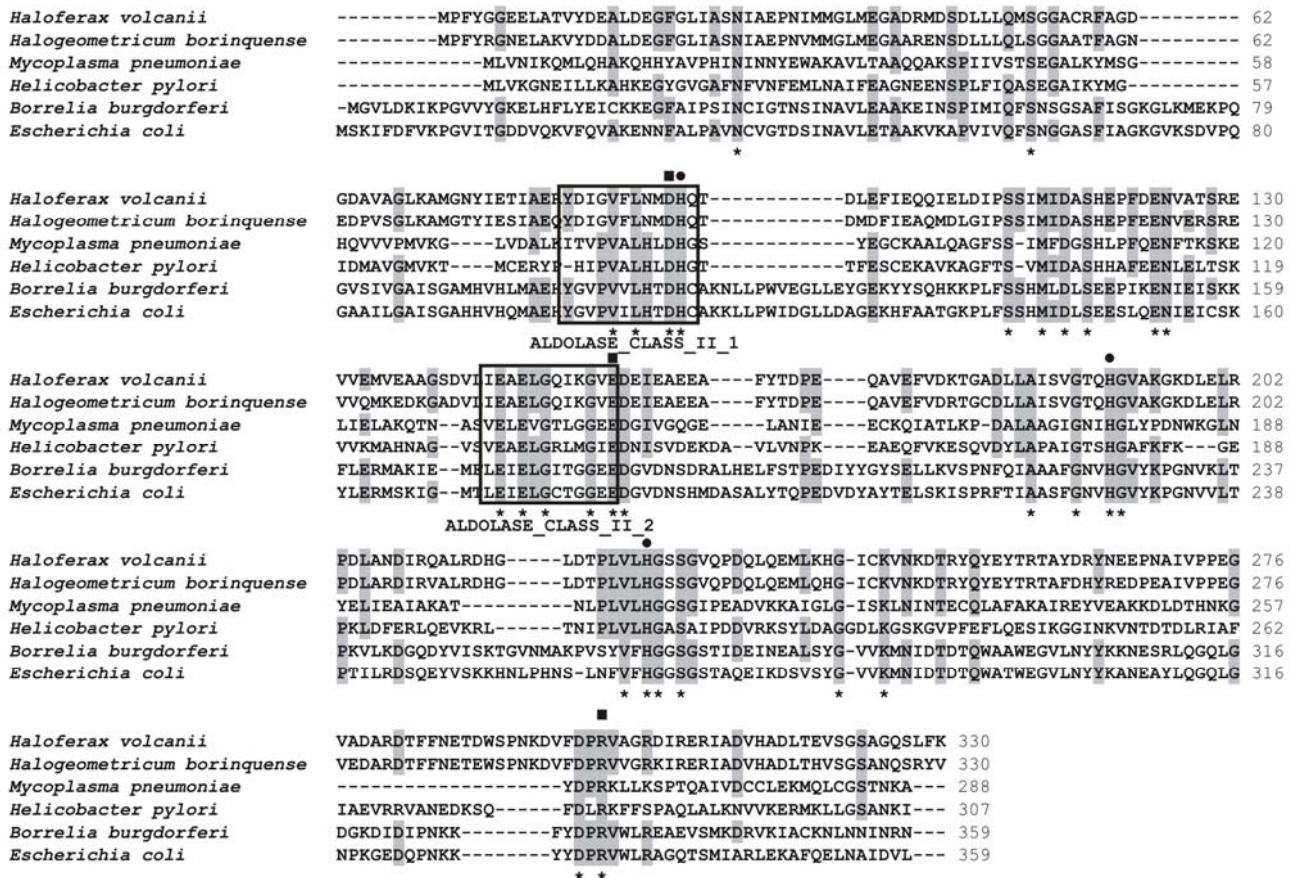

178 FIG. S6. Multiple amino acid sequence alignment of Class II fructose-1,6-bisphosphate  
 179 aldolases from the haloarchaea *H. volcanii* and *H. borinquense* and from selected bacteria.  
 180 The alignment was generated with ClustalX using the Gonnet Matrix (47). Consensus patterns  
 181 (ALDOLASE\_CLASS\_II\_1 and 2) are marked by boxes. The ALDOLASE\_CLASS\_II\_1  
 182 consensus pattern is [FYVMT]-x(1,3)-[LIVMH]-[APNT]-[LIVM]-x(1,2)-[LIVM]-H-x-D-H-  
 183 [GACH] (PS00602) and the ALDOLASE\_CLASS\_II\_2 pattern is [LIVM]-E-x-E-[LIVM]-G-  
 184 x(2)-[GM]-[GSTA]-x-E (PS00806). Conserved amino acids are marked by asterisks.  
 185 Additionally, the important catalytic residues R300, E155 and D92 (■) and histidines that  
 186 ligate the divalent cation H93, H191, H225, (●) are depicted (22). Accession numbers for the  
 187 aldolases are as follows: *Borrelia burgdorferi* (AAB91507), *Escherichia coli* (BAE76989),  
 188 *Haloferax volcanii* (YP\_003535543), *Haloferax volcanii* (ADQ67306),  
 189 *Helicobacter pylori* (CBI66947) and *Mycoplasma pneumoniae* (BAL21593).

## Supplemental Tables

| Gene     | primers for RT-PCR                                    | sequence 5'-3'                       | length PCR product [bp] |
|----------|-------------------------------------------------------|--------------------------------------|-------------------------|
| RibL     | RibL10-RT F                                           | ACAGCACAATATGGGCGACCTGC              | 337                     |
|          | RibL10-RT R                                           | GTCCTCGACGTCGCAGTAGATGG              |                         |
| HVO_1499 | HVO_1499RT_s                                          | CAAACGACGCAGAAGACGCAGTTC             | 706                     |
|          | HVO_1499RT_as                                         | CCCTCGGAGATGAGGCCGAC                 |                         |
|          | <b>primers for probe</b>                              |                                      |                         |
| HVO_1499 | HVO_1499Northern_s                                    | CAAACGACGCAGAAGACGCAGTTC             | 706                     |
|          | HVO_1499Northern_as                                   | CCCTCGGAGATGAGGCCGAC                 |                         |
| HVO_1500 | HVO_1500Northern_s2                                   | GACCGCCTCGGGCTTTCTCG                 | 707                     |
|          | HVO_1500Northern_as2                                  | CGTCTTCGAGGTCCGGGACG                 |                         |
| HVO_1494 | HVO_1494Northern_s                                    | GGACCACCAGACGGACCTCG                 | 718                     |
|          | HVO_1494Northern_as                                   | CTTGAACAGCGACTGGCCGGC                |                         |
|          | <b>primers for overexpression and complementation</b> |                                      |                         |
| HVO_1500 | HVO_1500 OE_s                                         | CGGAGTCGCATCATG <u>ATTCTCAC</u>      | 1000                    |
|          | HVO_1500 OE_as                                        | GTGCTCAGGATCCCTTTTCGAATATG           |                         |
| HVO_1494 | HVO_1494 OE_s                                         | TTGCGC <u>CATATGCACCACCACCACCACA</u> | 1077                    |
|          | HVO_1494 OE_as                                        | TGCCGTTCTACGGCGGGGAG                 |                         |
|          |                                                       | CGCGATGCGGATCCGACGAGC                |                         |
| HVO_1499 | HVO_1499 OE_s                                         | GTGGCAACACCATGGCAAACGAC              | 1248                    |
|          | HVO_1499 OE_as                                        | GCCGGCGGATCCTCGAGCG                  |                         |

**Table S1 Primers used for RT-PCR, Northern blot probe generation, overexpression and complementation.** Restriction enzyme cleavage sites were introduced in primers for overexpression and complementation (underlined). For HVO\_1500 *BspHI* and *BamHI* sites were included, primers for HVO\_1494 contain *NdeI* respectively *BamHI* sites and for HVO\_1499 *NcoI* and *BamHI* sites were used.

| <i>H. volcanii</i> | primers for deletion | sequence 5'-3'                            | length PCR product | length PCR fusion product | additional primer for Sth. Blot | sequence 5'-3'               | length of probe [bp] | used enzymes                  | length in Sth. blot WT/ $\Delta$ [bp/bp] |
|--------------------|----------------------|-------------------------------------------|--------------------|---------------------------|---------------------------------|------------------------------|----------------------|-------------------------------|------------------------------------------|
| $\Delta$ HVO_1500  | HVO_1500frgt1_s      | GTGGGCTCATCGAGCGGTCG                      | 697 bp             | 1347 bp                   | HVO_1500 probe_s                | GGCAACACTATG<br>GCAAACGACGC  | 506 bp               | <i>EcoRV</i> ,<br><i>PciI</i> | 5532 / 4731                              |
|                    | HVO_1500frgt1_as     | CACGTCTTCCGGTTCGTCGA<br>AGTGAATCGTGTG     |                    |                           |                                 |                              |                      |                               |                                          |
|                    | HVO_1500frgt2_s      | CTTCGACGAACCGGAAGACG<br>TGCTGACGAACGAAACG | 672 bp             |                           |                                 |                              |                      |                               |                                          |
|                    | HVO_1500frgt2_as     | GCGACCGGGATGAGGAGCAC                      |                    |                           |                                 |                              |                      |                               |                                          |
| $\Delta$ HVO_1499  | HVO_1499frgt1_s      | GGATGTCGCTTCCGACGTGGAC                    | 688 bp             | 1356 bp                   | HVO_1499 probe_as               | GTTCGTCAGCAC<br>GTCTTCGAGGTC | 464 bp               | <i>EcoRV</i> ,<br><i>PciI</i> | 5535 / 4546                              |
|                    | HVO_1499frgt1_as     | GCGATGACGGCCCCGGTCAT<br>CAGGTCTCCTTC      |                    |                           |                                 |                              |                      |                               |                                          |
|                    | HVO_1499frgt2_s      | GATGACCGGGGCCGTCATCGCG<br>ACGGCCATC       | 689 bp             |                           |                                 |                              |                      |                               |                                          |
|                    | HVO_1499frgt2_as     | GAGCTGTACGTCGGCGTCGAAC                    |                    |                           |                                 |                              |                      |                               |                                          |
| $\Delta$ HVO_1494  | HVO_1494frgt1_s      | CACTAGACCAATGAAAC<br>TCGTGCGAG            | 712 bp             | 1368 bp                   | HVO_1494 probe_s                | CCCACGTCGTTTA<br>AGGCGTCACG  | 441 bp               | <i>PstI</i> ,<br><i>SmaI</i>  | 8109 / 7230                              |
|                    | HVO_1494frgt1_as     | CACGTGCGGCGAGCGCCTCGTCG<br>TAACTGTG       |                    |                           |                                 |                              |                      |                               |                                          |
|                    | HVO_1494frgt2_s      | CGAGGCGCTCGCCGACGTGC<br>ACGCCGACC         | 675 bp             |                           |                                 |                              |                      |                               |                                          |
|                    | HVO_1494frgt2_as     | CGGCGGCAAGAA<br>AGGTGAACAGG               |                    |                           |                                 |                              |                      |                               |                                          |

**Table S2: Primers used for synthesis of deletion mutants and Southern probes.**
